# Supplementary material for: Development of thymic tumor in [LSL:KrasG12D; Pdx1-CRE] mice, an adverse effect associated with accelerated pancreatic carcinogenesis
Source: PubMed Central journal article supplement (PMC8302691; doi:10.1038/s41598-021-94566-x), 2021-07-23
Supplement: 41598_2021_94566_MOESM1_ESM.pdf [file 41598_2021_94566_MOESM1_ESM.pdf]

# Supplementary data

Development of thymic tumor in [*LSL:Kras<sup>G12D</sup>; Pdx1-CRE*] mice, an adverse effect associated with accelerated pancreatic carcinogenesis.

## Kras<sup>G12D</sup>

With thymic mass - Spleen

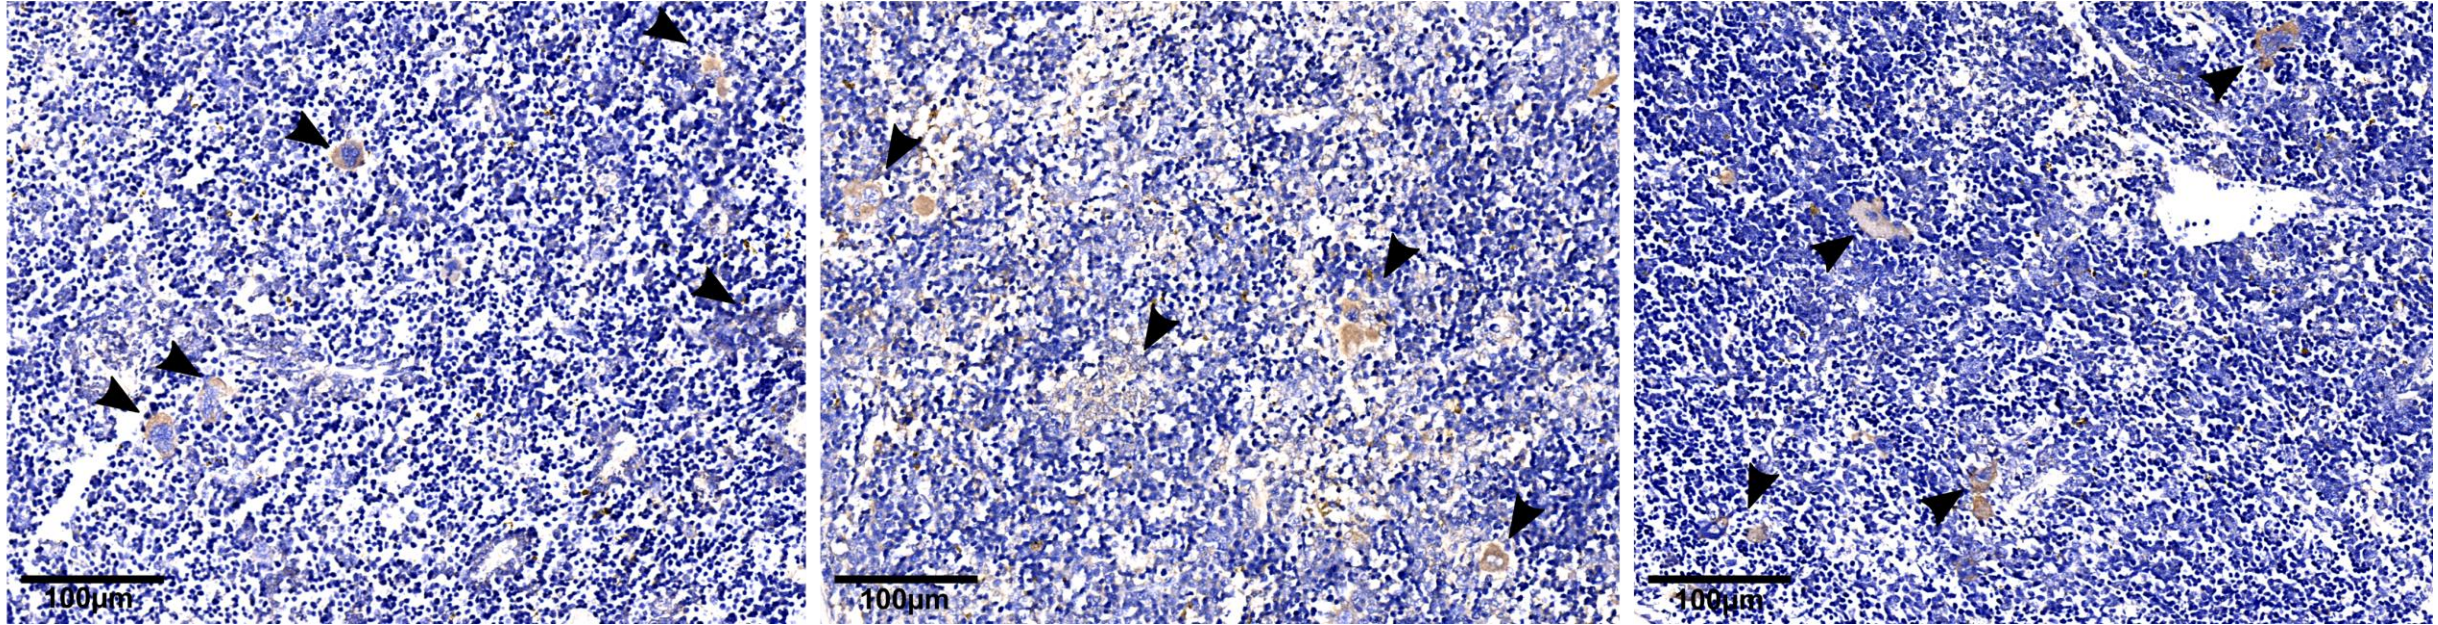

**Supplementary Figure S1: Presence of Kras<sup>G12D</sup> positive cells in spleen adjacent to pancreas.** Representative images of spleen adjacent to pancreas, labelled through anti-KRAS<sup>G12D</sup> immunohistochemistry. Kras<sup>G12D</sup> positive cells evoking invasion from pancreas to spleen are pointed by arrowheads. Scale bars are indicated on the pictures.

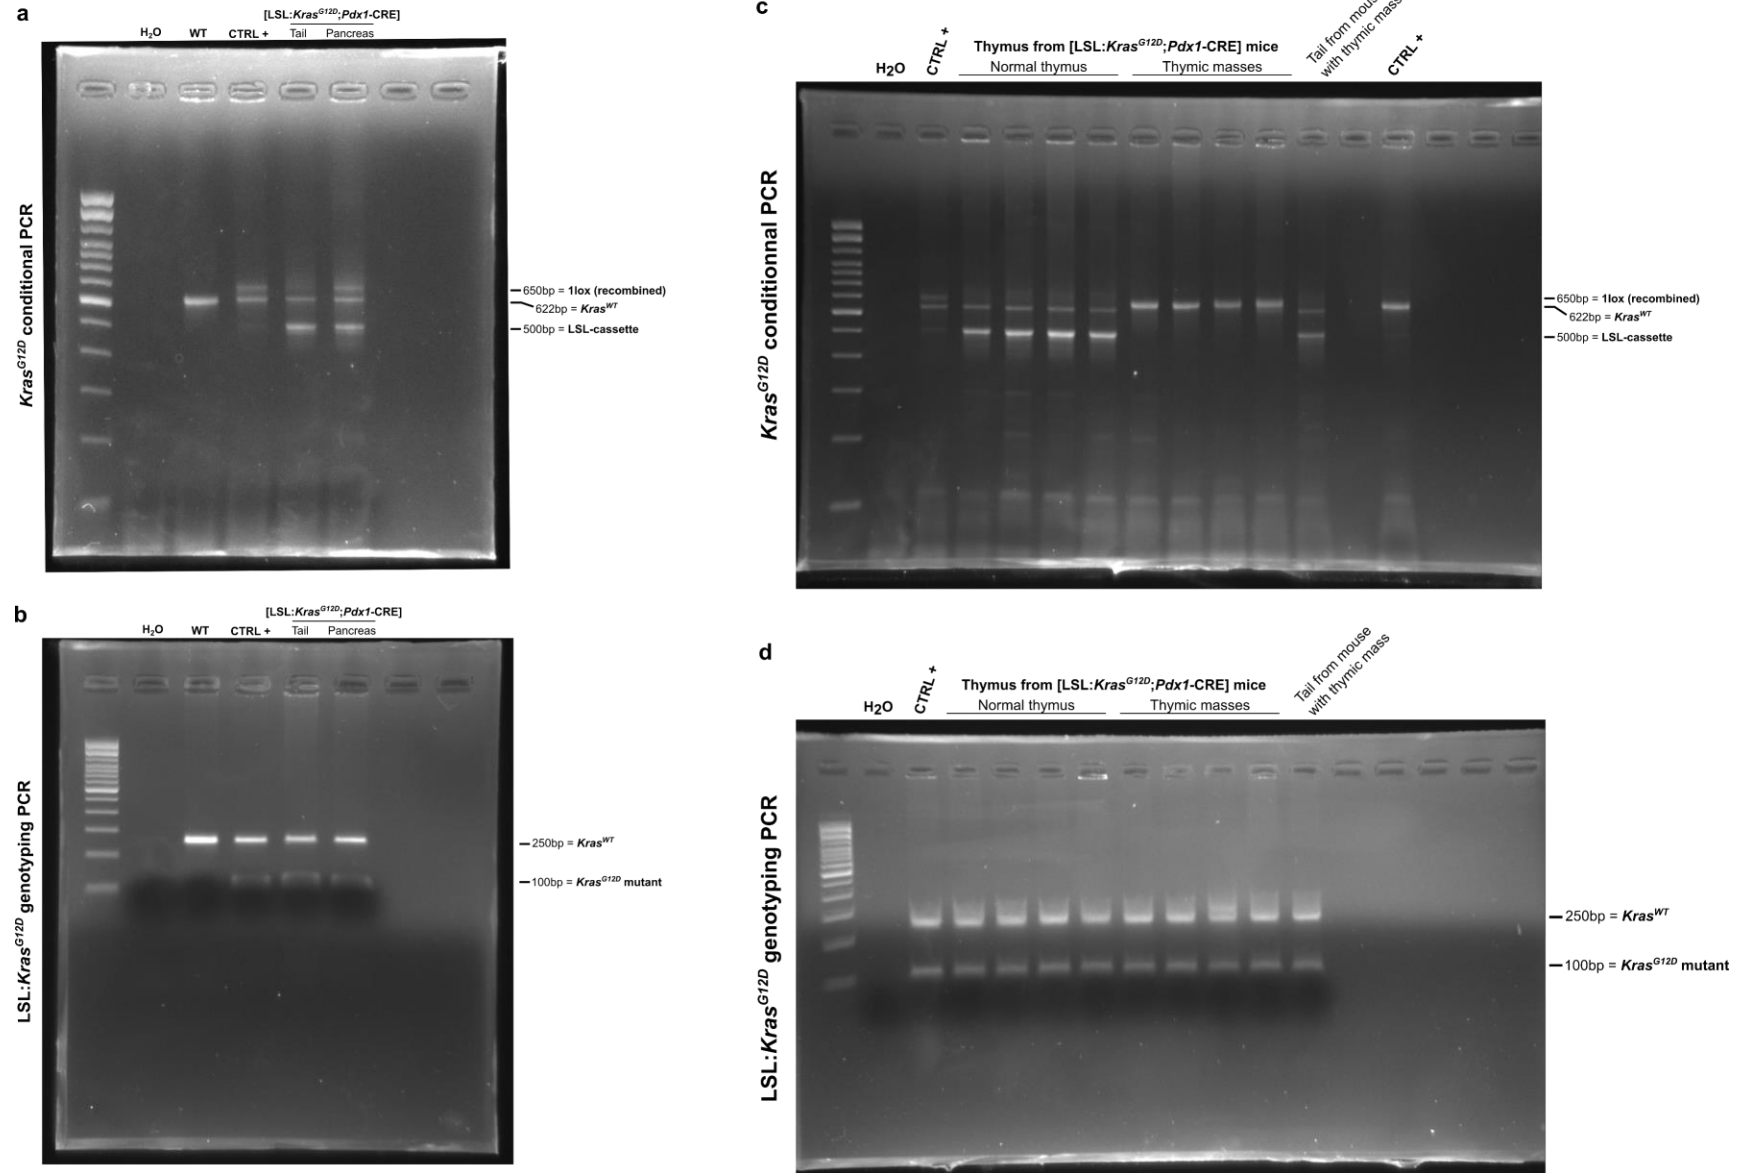

**Supplementary Figure S2: Uncropped pictures of the gels presented in Figure 1b Top (a), Figure 1b Bottom (b), Figure 3b Top (c) and Figure 3b Bottom (d).**
